# Supplementary material for: Siglec15 shapes a non-inflamed tumor microenvironment and predicts the molecular subtype in bladder cancer
Source: PubMed Central journal article supplement (PMC7847675; doi:10.7150/thno.53649), 2021-01-01
Supplement: thnov11p3089s1.pdf [file thnov11p3089s1.pdf]

## 1 **Supplementary files**

2 **Figure S1. Expression pattern and immunological correlation of Siglec15 in**  
3 **pan-cancers.** (A-C) The expression pattern of Siglec15 of pan-cancers in TCGA,  
4 TCGA combined with GTEx, and Oncomine. The asterisks indicated a significant  
5 statistical p value calculated with Mann-Whitney U test. (\*P < 0.05; \*\*P < 0.01; \*\*\*P  
6 < 0.001). (D) The expression of Siglec15 in BLCA cohort in Oncomine. (E-F) The  
7 expression of Siglec15 in cancer cell lines in BioGPS and CCLE. (G) The expression  
8 of Siglec15 in normal tissues. (H) Quantitative RT-PCR (qPCR) estimation on  
9 Siglec-15 mRNA levels in 30 paired bladder cancer and normal tissues.

10  
11 **Figure S2. Prognostic analysis of Siglec15 for overall survival in pan-cancers.** (A)  
12 The prognostic analyses of Siglec15 in pan-cancers using a univariate Cox regression  
13 model. Hazard ratio >1 indicated a risk factor and hazard ratio <1 represented a  
14 protective factor. (B-G) The prognostic analyses of Siglec15 in pan-cancers using  
15 Kaplan-Meier method and log-rank test. Only cancers in which Siglec15 was a  
16 significant prognostic biomarker were shown.

17  
18 **Figure S3. Prognostic analysis of Siglec15 for disease specific survival in**  
19 **pan-cancers.** (A) The prognostic analyses of Siglec15 in pan-cancers using a  
20 univariate Cox regression model. Hazard ratio >1 indicated a risk factor and hazard  
21 ratio <1 represented a protective factor. (B-G) The prognostic analyses of Siglec15 in  
22 pan-cancers using Kaplan-Meier method and log-rank test. Only cancers in which  
23 Siglec15 was a significant prognostic biomarker were shown.

24  
25 **Figure S4. Prognostic analysis of Siglec15 for progression free survival in**  
26 **pan-cancers.** (A) The prognostic analyses of Siglec15 in pan-cancers using a  
27 univariate Cox regression model. Hazard ratio >1 indicated a risk factor and hazard  
28 ratio <1 represented a protective factor. (B-G) The prognostic analyses of Siglec15 in  
29 pan-cancers using Kaplan-Meier method and log-rank test. Only cancers in which  
30 Siglec15 was a significant prognostic biomarker were shown.

31  
32 **Figure S5. Correlations between Siglec15 and TMB, MSI in pan-cancers.** (A)  
33 Correlation between Siglec15 and TMB in pan-cancers. (B) Correlation between  
34 Siglec15 and MSI in pan-cancers. The asterisks indicated a significant statistical p  
35 value calculated with spearman correlation analysis. (\*P < 0.05; \*\*P < 0.01; \*\*\*P <  
36 0.001).

37  
38 **Figure S6. Multi-omics analysis of Siglec15 in BLCA.** (A) CNV pattern of Siglec15  
39 in BLCA. (B) Effect of Siglec15 CNV pattern on the expression of Siglec15 mRNA.  
40 The asterisks indicated a significant statistical p value calculated with Mann-Whitney  
41 U test (\*P < 0.05; \*\*P < 0.01; \*\*\*P < 0.001). (C) Effect of Siglec15 methylation on  
42 the expression of Siglec15 mRNA. (D-E) The top 30 mutational genes in low and  
43 high Siglec15 group respectively. The upper barplot showed the TMB, the number on

44 the right showed the mutation frequency. The right barplot represented the proportion  
45 of variant types. (F) Overview of mutation profiles in BLCA.

46

47 **Figure S7. Correlations between Siglec15 and the tumor associated immune cells**  
48 **calculated with TIMER algorithm.** The p value was calculated with spearman  
49 correlation analysis.

50

51 **Figure S8. Correlations between Siglec15 and the tumor associated immune cells**  
52 **calculated with CIBERSORT-ABS algorithm.** The p value was calculated with  
53 spearman correlation analysis.

54

55 **Figure S9. Correlations between Siglec15 and the tumor associated immune cells**  
56 **calculated with quanTIseq algorithm.** The p value was calculated with spearman  
57 correlation analysis.

58

59 **Figure S10. Correlations between Siglec15 and the tumor associated immune**  
60 **cells calculated with xCell algorithm.** The p value was calculated with spearman  
61 correlation analysis.

62

63 **Figure S11. Correlations between Siglec15 and the tumor associated immune**  
64 **cells calculated with TISIDB algorithm.** The p value was calculated with spearman  
65 correlation analysis.

66

67 **Figure S12. Correlations between Siglec15 and the tumor associated immune**  
68 **cells calculated with TIP algorithm.** The p value was calculated with spearman  
69 correlation analysis.

70

71 **Figure S13. Correlations between Siglec15 and the tumor associated immune**  
72 **cells calculated with MCP-counter algorithm.** The p value was calculated with  
73 spearman correlation analysis.

74

75 **Figure S14. Correlations between Siglec15, tumor associated immune cells and**  
76 **immune phenotypes.** (A) Correlations between Siglec15 and the effector genes of  
77 five tumor associated immune cells . (B-E) Correlations between Siglec15 and four  
78 critical marker genes of macrophages. (F) Expression of Siglec15, PD-L1, and CD8 in  
79 the bladder cancer microarray (TMA) cohort were detected using  
80 immunohistochemistry. Representative images of CD8, PD-L1, and Siglec15 in three  
81 immune phenotypes were displayed. The scale bars correspond to 200  $\mu$ m. (G) CD8  
82 positive rates in the three immune phenotypes in BLCA TMA cohort detected by  
83 immunofluorescence. (H) Correlation between Siglec15 positive rates and CD8  
84 positive rates detected using immunohistochemistry. (I) Correlation between PD-L1  
85 positive rates and CD8 positive rates detected using immunofluorescence. (I)  
86 Correlation between PD-L1 positive rates and Siglec15 positive rates detected using  
87 immunofluorescence.

88

89 **Figure S15. Correlations between Siglec15 and the immunological status, the**  
90 **enrichment scores of therapeutic signatures, and the molecular subtype in**  
91 **GSE32894 cohort.** (A-C) Correlation between Siglec15 and immunomodulators,  
92 effector genes of tumor associated immune cells, and inhibitory immune checkpoints  
93 in BLCA. (D) Correlation between Siglec15 and enrichment scores of immunotherapy  
94 predicted signatures. The asterisks indicated a significant statistical p value calculated  
95 with Mann-Whitney U test (\*P < 0.05; \*\*P < 0.01; \*\*\*P < 0.001). (E) Correlation  
96 between Siglec15 and molecular subtype and bladder cancer signatures. (F)  
97 Correlation between Siglec15 and enrichment scores of therapeutic signatures,  
98 including radiotherapy, targeted therapy.

99

100 **Figure S16. Correlations between Siglec15 and the immunological status, the**  
101 **enrichment scores of therapeutic signatures, and the molecular subtype in**  
102 **GSE31684 cohort.** (A-C) Correlation between Siglec15 and immunomodulators,  
103 effector genes of tumor associated immune cells, and inhibitory immune checkpoints  
104 in BLCA. (D) Correlation between Siglec15 and enrichment scores of immunotherapy  
105 predicted signatures. The asterisks indicated a significant statistical p value calculated  
106 with Mann-Whitney U test (\*P < 0.05; \*\*P < 0.01; \*\*\*P < 0.001). (E) Correlation  
107 between Siglec15 and molecular subtype and bladder cancer signatures. (F)  
108 Correlation between Siglec15 and enrichment scores of therapeutic signatures,  
109 including radiotherapy, targeted therapy.

110

111 **Figure S17. Correlations between Siglec15 and the immunological status, the**  
112 **enrichment scores of therapeutic signatures, and the molecular subtype in**  
113 **IMvigor210 cohort.** (A-C) Correlation between Siglec15 and immunomodulators,  
114 effector genes of tumor associated immune cells, and inhibitory immune checkpoints  
115 in BLCA. (D) Correlation between Siglec15 and enrichment scores of immunotherapy  
116 predicted signatures. The asterisks indicated a significant statistical p value calculated  
117 with Mann-Whitney U test (\*P < 0.05; \*\*P < 0.01; \*\*\*P < 0.001). (E) Correlation  
118 between Siglec15 and molecular subtype and bladder cancer signatures. (F)  
119 Correlation between Siglec15 and enrichment scores of therapeutic signatures,  
120 including radiotherapy, targeted therapy.

121

122 **Figure S18. Correlations between Siglec15 and the immune signatures in CR**  
123 **subgroup of IMvigor210 cohort.** (A-C) Correlation between Siglec15 and  
124 immunomodulators, effector genes of tumor associated immune cells, and inhibitory  
125 immune checkpoints in BLCA. (D) Correlation between Siglec15 and enrichment  
126 scores of immunotherapy predicted signatures. The asterisks indicated a significant  
127 statistical p value calculated with Mann-Whitney U test (\*P < 0.05; \*\*P < 0.01; \*\*\*P  
128 < 0.001).

129

130 **Figure S19. Correlations between Siglec15 and the immune signatures in PR**  
131 **subgroup of IMvigor210 cohort.** (A-C) Correlation between Siglec15 and

132 immunomodulators, effector genes of tumor associated immune cells, and inhibitory  
133 immune checkpoints in BLCA. (D) Correlation between Siglec15 and enrichment  
134 scores of immunotherapy predicted signatures. The asterisks indicated a significant  
135 statistical p value calculated with Mann-Whitney U test (\*P < 0.05; \*\*P < 0.01; \*\*\*P  
136 < 0.001).

137

138 **Figure S20. Correlations between Siglec15 and the immune signatures in PD**  
139 **subgroup of IMvigor210 cohort.** (A-C) Correlation between Siglec15 and  
140 immunomodulators, effector genes of tumor associated immune cells, and inhibitory  
141 immune checkpoints in BLCA. (D) Correlation between Siglec15 and enrichment  
142 scores of immunotherapy predicted signatures. The asterisks indicated a significant  
143 statistical p value calculated with Mann-Whitney U test (\*P < 0.05; \*\*P < 0.01; \*\*\*P  
144 < 0.001).

145

146 **Figure S21. Correlations between Siglec15 and the immune signatures in SD**  
147 **subgroup of IMvigor210 cohort.** (A-C) Correlation between Siglec15 and  
148 immunomodulators, effector genes of tumor associated immune cells, and inhibitory  
149 immune checkpoints in BLCA. (D) Correlation between Siglec15 and enrichment  
150 scores of immunotherapy predicted signatures. The asterisks indicated a significant  
151 statistical p value calculated with Mann-Whitney U test (\*P < 0.05; \*\*P < 0.01; \*\*\*P  
152 < 0.001).

153

154 **Figure S22. Correlations between Siglec15 and the hyper-progression associated**  
155 **genes, and the predictive accuracy of Siglec15 for molecular subtype in four**  
156 **validation sets.** (A) Correlation between Siglec15 and CNV pattern of  
157 hyper-progression associated genes in BLCA. The p value was calculated with Fisher  
158 t test. (B) Correlation between Siglec15 and mRNA expression of hyper-progression  
159 associated genes in BLCA. The asterisks indicated a significant statistical p value  
160 calculated with Mann-Whitney U test (\*P < 0.05; \*\*P < 0.01; \*\*\*P < 0.001). (C-F)  
161 The predictive value of Siglec15 for molecular subtype in four independent validation  
162 sets, including an immunotherapy cohort (IMvigor210), a neoadjuvant-chemotherapy  
163 cohort(GSE70691), and two general bladder cancer cohorts(GSE31684, GSE48277).

164

165 **Figure S23. Role of Siglec15 in predicting molecular subtypes and therapeutic**  
166 **sensitivities in Xiangya cohort.** (A) Correlations between Siglec15 and molecular  
167 subtypes and bladder cancer signatures. (B) ROC curves indicated the predictive  
168 accuracy of Siglec15 in predicting molecular subtypes. (C) Correlations between  
169 Siglec15 and enrichment scores of therapeutic signatures, including radiotherapy,  
170 targeted therapy.

171

172 **Figure S24. Differentially expressed RNAs between the Siglec15 groups, the**  
173 **immune score groups and the stromal score groups.** (A-F) Differential analysis of  
174 RNAs between Siglec15 groups, immune score groups and stromal score groups. The  
175 criterias for determining differentially expressed RNAs were set as adjusted P value <

176 0.01 and  $|\log_{2}FC| > 1$ . (G) 1500 common immune-related differential RNAs shown in  
177 Venn diagram. (H-I) There is no intersection between RNAs up-expressed among  
178 high Siglec15 group and RNAs up-expressed among high immune/stromal score  
179 groups. Similarly, there is no intersection between RNAs down-expressed among high  
180 Siglec15 group and RNAs down-expressed among high immune/stromal score groups.  
181 (J) There is 1010 common RNAs between RNAs down-expressed among high  
182 Siglec15 group and RNAs up-expressed among high immune/stromal score groups.  
183 (K) There is 490 common RNAs between genes up-expressed among high Siglec15  
184 group and RNAs down-expressed among high immune/stromal score groups.

185

186 **Figure S25. GO and KEGG analysis of 1500 common differentially expressed**  
187 **RNAs.** (A-C) Biological process, cellular component, and molecular function of 1500  
188 common differentially expressed RNAs. (D) KEGG analysis of 1500 common  
189 differentially expressed RNAs.

190

191 **Figure S26. Performance of the IRS RNA-expression profiles in predicting**  
192 **survival in five independent validation cohorts.** (A-E) Survival in high vs. low-IRS  
193 patients depicted by KM plots and ROC curves to depict the accuracy of IRS in five  
194 bladder cancer cohorts. (E) Survival in high vs. low-IRS patients depicted by KM  
195 plots and ROC curves to depict the accuracy of IRS in GSE135222 (lung cancer).

196

197 **Figure S27. Performance of the IRS RNA-expression profiles in predicting**  
198 **survival in subgroups of IMvigor210 cohort.** (A-H) Survival in high vs. low-IRS  
199 patients depicted by KM plots and ROC curves to depict the accuracy of IRS in eight  
200 subgroups of IMvigor210 cohort, including CR/PR subgroup, SD/PD subgroup, IC0  
201 subgroup, IC1 subgroup, IC2 subgroup, TC0 subgroup, TC1 subgroup, TC2  
202 subgroup.

203

204 **Figure S28. Performance of the IRS RNA-expression profiles in predicting**  
205 **survival in subgroups of IMvigor210 cohort.** (A-H) Survival in high vs. low-IRS  
206 patients depicted by KM plots and ROC curves to depict the accuracy of IRS in eight  
207 subgroups of IMvigor210 cohort, including deserts phenotype subgroup, excluded  
208 phenotype subgroup, inflamed phenotype subgroup, ECOG score0 subgroup, ECOG  
209 score1 subgroup, ECOG score2 subgroup, pre-platinum therapy subgroup, no  
210 pre-platinum therapy subgroup.

211

212 **Figure S29. IRS predicted the clinical response of cancer immunotherapy.**

213 (A) Correlation between Siglec15 and IRS. (B-C) Correlations between IRS and the  
214 pan-cancer T cell inflamed score, and the inhibitory immune checkpoints. (D-E)  
215 Correlations between the IRS and immunomodulators, and the tumor-associated  
216 immune cells. (F) Correlations between the IRS and the activities of cancer immunity  
217 cycles. (G) Correlations between the IRS and the enrichment score of immunotherapy  
218 predicted pathways. The asterisks indicated a significant statistical p-value calculated

219 with Mann-Whitney U test (\*P < 0.05; \*\*P < 0.01; \*\*\*P < 0.001).

220

221 **Figure S30. Comparisons of the accuracy in predicting ICB response and**  
222 **survival probability between IRS and TIDE algorithms in GSE78220.**

223 (A) The accuracy of two algorithms in predicting ICB response. (B-C) Survival in  
224 high vs. low TIDE, and in high vs. low IRS patients depicted by KM plots. (D-E)  
225 ROC curves to depict the accuracy of TIDE and IRS in predicting survival  
226 probability.

227

228 **Figure S31. Comparisons of the accuracy in predicting ICB response and**  
229 **survival probability between IRS and TIDE algorithms in GSE91061.**

230 (A) The accuracy of two algorithms in predicting ICB response. (B-C) Survival in  
231 high vs. low TIDE, and in high vs. low IRS patients depicted by KM plots. (D-E)  
232 ROC curves to depict the accuracy of TIDE and IRS in predicting survival  
233 probability.

234

235 **Figure S32. Comparisons of the accuracy in predicting ICB response and**  
236 **survival probability between IRS and TIDE algorithms in PMID29301960.**

237 (A) The accuracy of two algorithms in predicting ICB response. (B-C) Survival in  
238 high vs. low TIDE, and in high vs. low IRS patients depicted by KM plots. (D-E)  
239 ROC curves to depict the accuracy of TIDE and IRS in predicting survival  
240 probability.

241

242 **Figure S33. Comparisons of the accuracy in predicting ICB response and**  
243 **survival probability between IRS and TIDE algorithms in IMvigor210.**

244 (A) The accuracy of two algorithms in predicting ICB response. (B-C) Survival in  
245 high vs. low TIDE, and in high vs. low IRS patients depicted by KM plots. (D-E)  
246 ROC curves to depict the accuracy of TIDE and IRS in predicting survival  
247 probability.

248

249

250 **Table S1.** Characters of data sets; Abbreviations of cancer types; Cox analysis in  
251 TCGA BLCA cohort.

252

253 **Table S2.** Correlations between Siglec15 and 122 immunomodulators, PD-L1,  
254 PD-1,CTLA-3, LAG-3.

255

256 **Table S3.** Comparisons of the cancer-immunity cycle activity between Siglec15  
257 groups.

258

259 **Table S4.** Infiltration level of tumor associated immune cells in BLCA estimated by  
260 using different algorithms.  
261  
262 **Table S5.** Comparisons of the effector genes of tumor associated immune cells  
263 between Siglec15 groups.  
264  
265 **Table S6.** Comparisons of the inhibitory immune checkpoints between Siglec15  
266 groups.  
267  
268 **Table S7.** The pan-cancer T cell inflamed score of TCGA BLCA patients.  
269  
270 **Table S8.** The CNV patterns of hyper-progression associated genes in BLCA.  
271  
272 **Table S9.** Detailed information of immunotherapy predicted signatures, bladder  
273 cancer signatures and other therapeutic signatures.  
274  
275 **Table S10.** Comparisons of therapeutic sensitivity of drug genes used in BCLA  
276 between Siglec15 groups.  
277  
278 **Table S11.** Molecular subtypes of patients in TCGA BLCA cohort.  
279  
280 **Table S12.** Expression of Siglec15, PD-L1, and CD8 in the clinical validation set.  
281  
282 **Table S13.** Comparisons of the enrichment score of therapeutic predicted pathways  
283 between Siglec15 groups.  
284  
285 **Table S14.** Correlations between Siglec15 and immunomodulators in Xiangya cohort.  
286  
287 **Table S15.** 1500 common differentially expressed RNAs.  
288  
289 **Table S16.** GO, KEGG analysis of 1500 common differentially expressed RNAs.  
290  
291 **Table S17.** Protein-protein interaction analysis of 1500 differentially expressed  
292 RNAs.  
293  
294 **Table S18.** Univariate cox analysis of 1500 common differentially expressed RNAs.  
295  
296  
297
